# Supplementary material for: Tumour Size and Overall Survival in a Cohort of Patients with Unifocal Glioblastoma: A Uni- and Multivariable Prognostic Modelling and Resampling Study
Source: MDPI journal article supplement (doi:10.3390/cancers16071301), 2024-03-27
Supplement: s1 [file s1]

**Figure S1.** Histograms of tumour diameter, core tumour, and whole tumour volumes before and after logarithmic transformation

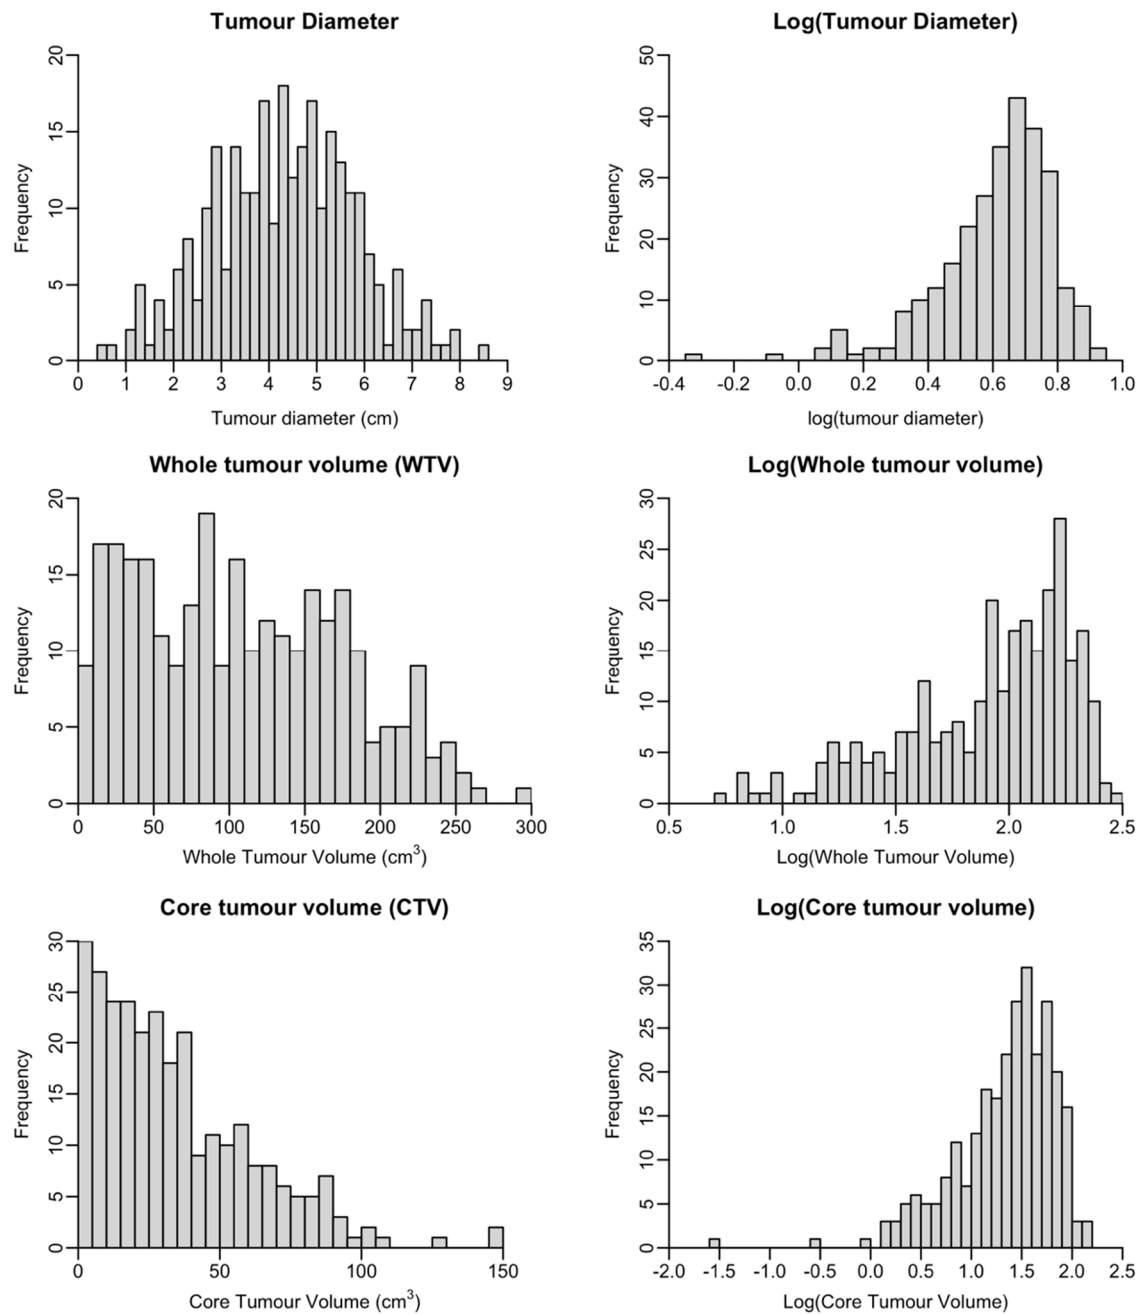

**Figure S2a.** Non-linear modelling of tumour diameter with log-transformation and penalised splines.

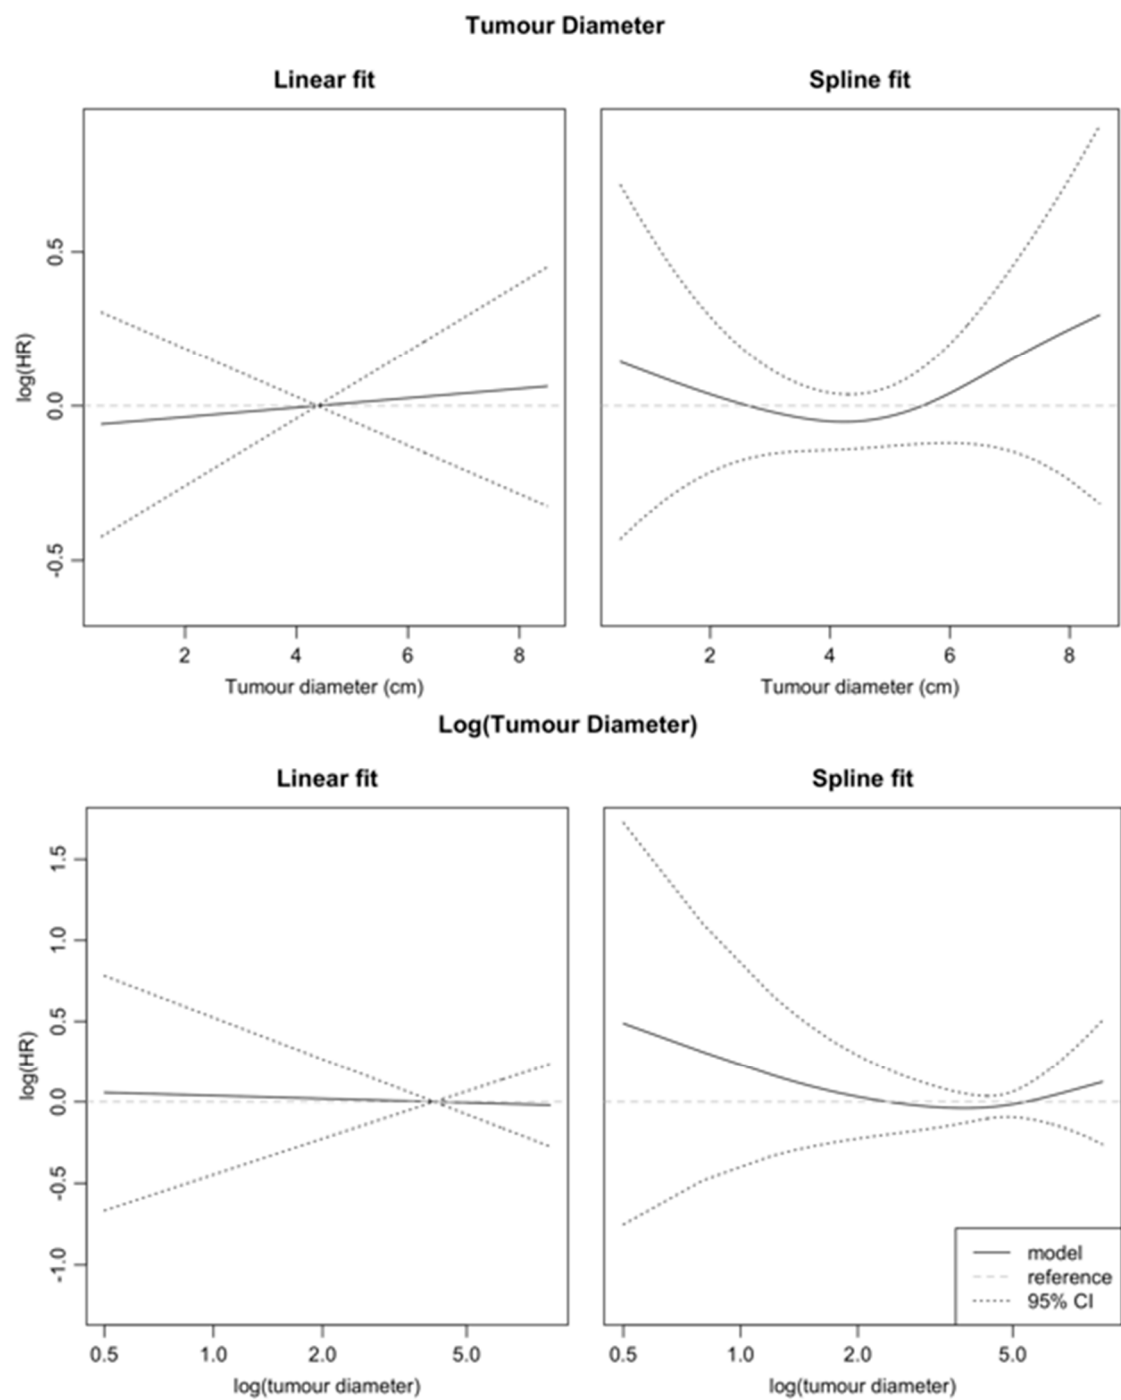

**Figure S2b.** Non-linear modelling of whole tumour volume with log-transformation and penalised splines.

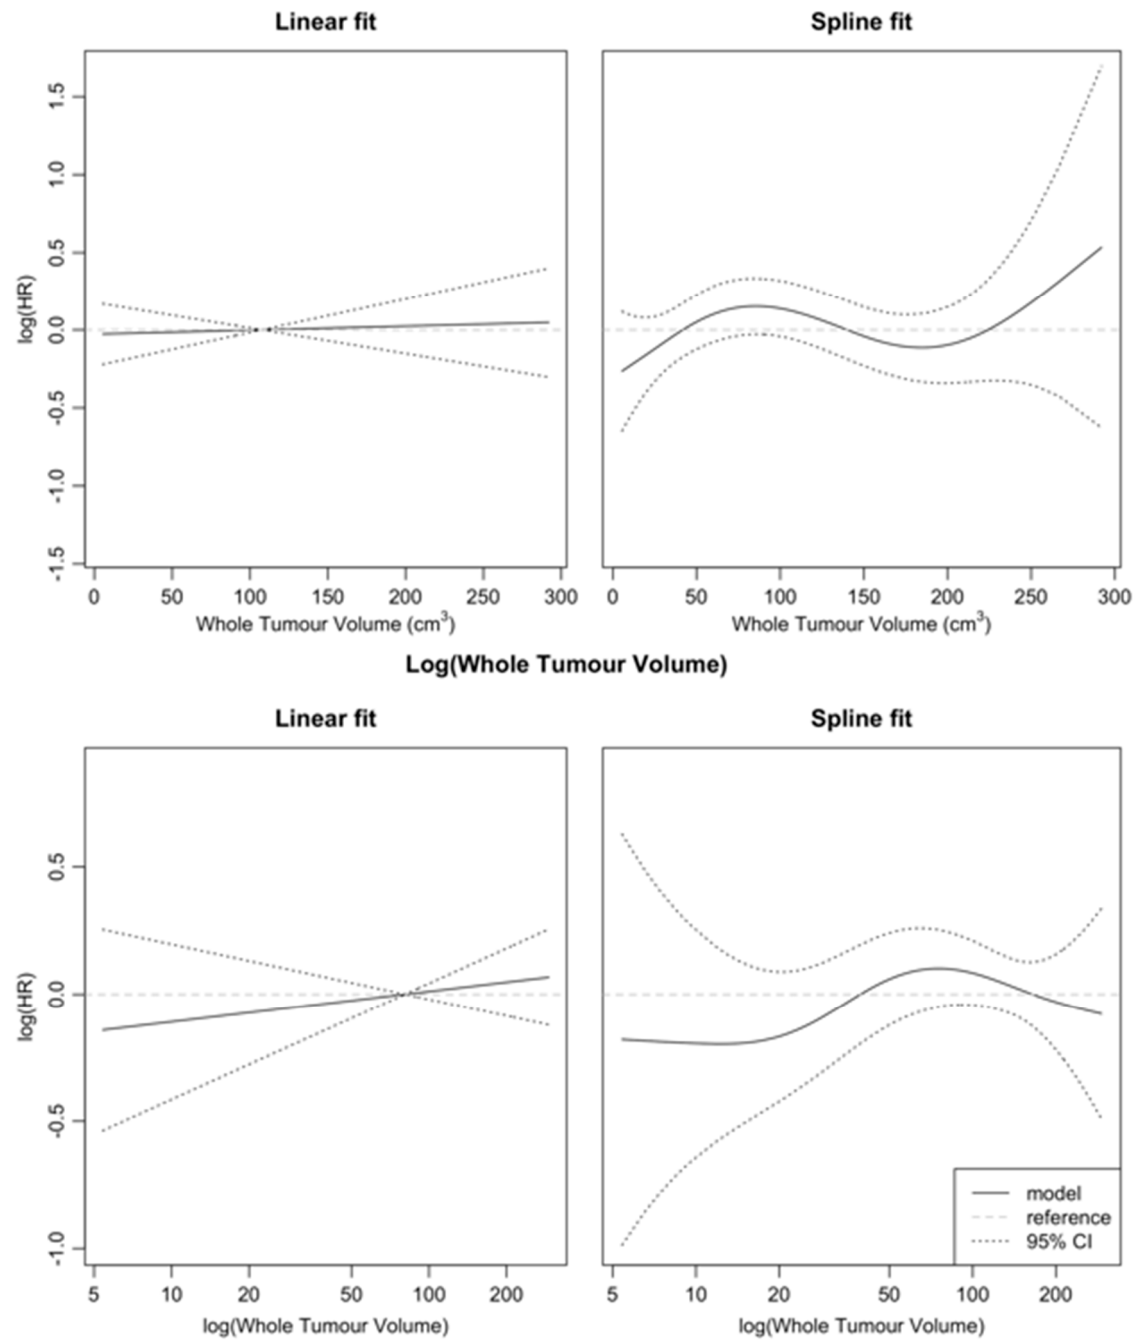

**Figure S2c.** Non-linear modelling of core tumour volume with log-transformation and penalised splines

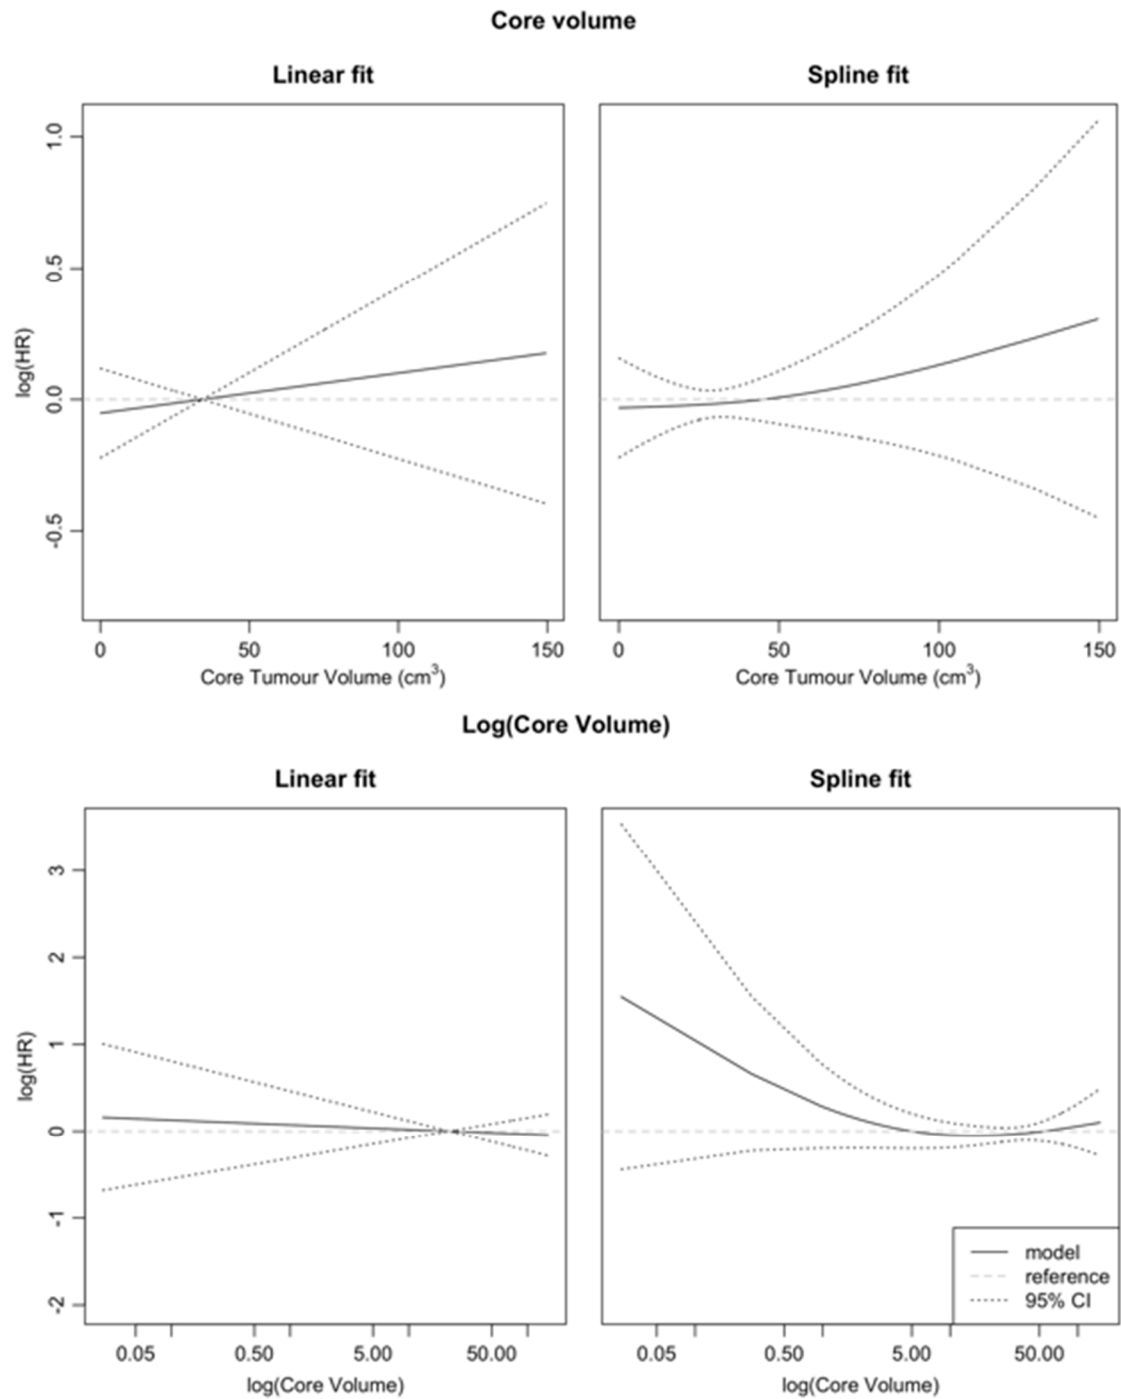

**Supplementary Figure 2a-c.** For each 2 x 2 plot, the top row shows models before log-transformation and the bottom row shows them after log-transformation. The graph on the left illustrates a linear fit to the data points and the graph on the right shows a fit of a penalised spline function to fit the data points more closely. HR—hazard ratio.

**Table S1.** Summary of MRI acquisition parameter per imaging sequence

| Sequence | Parameter summary                                                                                                                                                                                                                                                      |
|----------|------------------------------------------------------------------------------------------------------------------------------------------------------------------------------------------------------------------------------------------------------------------------|
| T1       | Slice thickness 5mm (0 – 5 mm), spacing between slices 5.5 mm (0.6 – 7mm), echo time 7.8 ms (3.0 – 58 ms), repetition time 550 ms (7.0 – 3200 ms), field strength 1.5 T (1.5 – 3.0 T), flip angle 90 deg (8 – 150 deg)                                                 |
| T2       | Slice thickness 5 mm (1.2 – 7 mm), spacing between slices 5.5 mm (0.6 – 7.7 mm), echo time 98 ms (25 – 171 ms), repetition time 5268.6 ms (660 – 6600 ms), field strength 1.5 T (1.5 – 3.0 T), flip angle 150 deg (20 – 180 deg)                                       |
| FLAIR    | Slice thickness 5mm (0.7 – 5 mm), spacing between slices 5.5mm (0.6 – 7 mm), echo time 109 ms (82 – 474 ms), inversion time 2500 ms (1660 – 2880 ms), repetition time 9000 ms (4610 – 14788 ms), field strength 1.5 T (1.5 – 3.0 T), flip angle 150 deg (90 – 180 deg) |
| T1Gd     | Slice thickness 1.1 mm (0 – 7 mm), spacing between slices 5.9 mm (0.5 – 7.7 mm), echo time 3.9 ms (2.3 – 46 ms), repetition time 700 ms (7.5 – 3200 ms), field strength 1.5 T (1.5 – 3.0 T), flip angle 15 deg (8 – 150 deg)                                           |

Values for acquisition parameters are presented as median (range). FLAIR—Fluid attenuated inversion recovery.

T1Gd—Post-gadolinium T1-weighted imaging.

**Table S2a.** Univariable association between clinical variables and overall survival.

| Characteristic             | N                | Event N | HR   | 95% CI     | p-value |
|----------------------------|------------------|---------|------|------------|---------|
| Age                        | 279              | 236     | 1.01 | 1.00, 1.03 | 0.060   |
| Sex                        | 279              | 236     |      |            |         |
| Female                     |                  |         | —    | —          |         |
| Male                       |                  |         | 1.26 | 0.96, 1.64 | 0.091   |
| Operation                  | 279              | 236     |      |            |         |
| Biopsy                     |                  |         | —    | —          |         |
| 100% resected <sup>a</sup> |                  |         | 0.34 | 0.23, 0.50 | <0.001  |
| ≥90% resected <sup>a</sup> |                  |         | 0.38 | 0.27, 0.54 | <0.001  |
| <90% resected <sup>a</sup> |                  |         | 0.50 | 0.35, 0.71 | <0.001  |
| Stupp                      | 279              | 236     |      |            |         |
| No Stupp                   |                  |         | —    | —          |         |
| Full Stupp <sup>b</sup>    |                  |         | 0.29 | 0.20, 0.41 | <0.001  |
| Partial Stupp <sup>c</sup> |                  |         | 0.49 | 0.36, 0.67 | <0.001  |
| MGMT                       | 258 <sup>d</sup> | 219     |      |            |         |
| Unmethylated               |                  |         | —    | —          |         |
| Methylated                 |                  |         | 0.56 | 0.42, 0.74 | <0.001  |

HR—Hazard ratio; CI—Confidence interval.

<sup>a</sup>Percentage of contrast enhancing and necrotic tumour core removed.

<sup>b</sup>Completed 60Gy in 30 fractions radiotherapy with concomitant temozolomide and 6 cycles adjuvant temozolomide.

<sup>c</sup>Completed 60Gy in 30 fractions radiotherapy but stopped temozolomide either during radiotherapy or adjuvant course.

<sup>d</sup>Number of cases with known result.

**Table S2b.** Prognostic effect of each clinical variable within a multivariable model adjusted for all other clinical variables.

| Characteristic             | HR   | 95% CI     | p-value |
|----------------------------|------|------------|---------|
| Age                        | 1.00 | 0.98, 1.02 | 0.98    |
| Sex                        |      |            |         |
| Female                     | —    | —          |         |
| Male                       | 1.31 | 0.99, 1.75 | 0.061   |
| Operation                  |      |            |         |
| Biopsy                     | —    | —          |         |
| 100% resected <sup>a</sup> | 0.38 | 0.25, 0.56 | <0.001  |
| ≥90% resected <sup>a</sup> | 0.36 | 0.25, 0.52 | <0.001  |
| <90% resected <sup>a</sup> | 0.43 | 0.29, 0.63 | <0.001  |
| Stupp                      |      |            |         |
| No Stupp                   | —    | —          |         |
| Full Stupp <sup>b</sup>    | 0.34 | 0.23, 0.50 | <0.001  |
| Partial Stupp <sup>c</sup> | 0.56 | 0.39, 0.79 | <0.001  |
| MGMT                       |      |            |         |
| Unmethylated               | —    | —          |         |
| Methylated                 | 0.67 | 0.50, 0.90 | 0.007   |

HR—Hazard ratio, CI—Confidence interval. Multivariable model included age, sex, operation type, Stupp status, and MGMT methylation.

n = 258 (219 events) = cases with complete results for all clinical variables.

<sup>a</sup>Percentage of contrast enhancing and necrotic tumour core removed.

<sup>b</sup>Completed 60Gy in 30 fractions radiotherapy with concomitant temozolomide and 6 cycles adjuvant temozolomide.

<sup>c</sup>Completed 60Gy in 30 fractions radiotherapy with concomitant temozolomide and began adjuvant temozolomide.

**Table S3a.** Percentage of univariable tumour size models with model p-values <0.05 during the resampling study.

| Sample size | Tumour Diameter |               | Whole Volume (WV) |         | Core Volume (CV) |         |
|-------------|-----------------|---------------|-------------------|---------|------------------|---------|
|             | Diameter        | log(diameter) | WV                | log(WV) | CV               | log(CV) |
| 50          | 5.43            | 5.95          | 5.14              | 5.20    | 5.07             | 7.07    |
| 100         | 5.60            | 5.94          | 5.12              | 5.94    | 5.73             | 7.57    |
| 150         | 5.84            | 6.00          | 5.21              | 6.93    | 6.53             | 8.00    |
| 200         | 6.05            | 6.04          | 5.35              | 8.00    | 7.32             | 8.36    |
| 250         | 6.25            | 6.07          | 5.53              | 9.04    | 8.15             | 8.68    |
| 279         | 6.39            | 6.13          | 5.60              | 9.70    | 8.60             | 8.94    |

CV— Core volume; WV— Whole volume.

**Table S3b.** Percentage of univariable tumour size models with model p-values <0.01 during the resampling study.

| Sample size | Tumour Diameter |               | Whole Volume (WV) |         | Core Volume (CV) |         |
|-------------|-----------------|---------------|-------------------|---------|------------------|---------|
|             | Diameter        | log(diameter) | WV                | log(WV) | CV               | log(CV) |
| 50          | 1.12            | 1.31          | 1.05              | 1.06    | 0.91             | 1.66    |
| 100         | 1.16            | 1.26          | 1.03              | 1.26    | 1.13             | 1.91    |
| 150         | 1.26            | 1.31          | 1.05              | 1.57    | 1.39             | 2.12    |
| 200         | 1.34            | 1.33          | 1.09              | 1.90    | 1.66             | 2.26    |
| 250         | 1.40            | 1.34          | 1.15              | 2.29    | 1.93             | 2.39    |
| 279         | 1.44            | 1.33          | 1.16              | 2.51    | 2.08             | 2.49    |

CV— Core volume; WV— Whole volume.



**Table S3c.** Percentage of univariable tumour size models with model p-values <0.001 during the resampling study.

| Sample size | Tumour Diameter |               | Whole volume (WV) |         | Core Volume (CV) |         |
|-------------|-----------------|---------------|-------------------|---------|------------------|---------|
|             | Diameter        | log(diameter) | WV                | log(WV) | CV               | log(CV) |
| 50          | 0.11            | 0.15          | 0.11              | 0.11    | 0.08             | 0.21    |
| 100         | 0.12            | 0.14          | 0.10              | 0.14    | 0.10             | 0.27    |
| 150         | 0.14            | 0.14          | 0.10              | 0.18    | 0.14             | 0.30    |
| 200         | 0.15            | 0.15          | 0.11              | 0.22    | 0.18             | 0.34    |
| 250         | 0.16            | 0.15          | 0.11              | 0.30    | 0.22             | 0.36    |
| 279         | 0.17            | 0.15          | 0.12              | 0.33    | 0.24             | 0.39    |

CV— Core volume; WV—Whole volume.

**Table S4a.** Percentage of resamples in which the multivariable tumour size model adjusted for patient age (i.e., age + tumour size in the model) has a tumour size regression coefficient Wald test p-value <0.05.

| Sample size | Tumour Diameter |               | Whole Volume (WV) |         | Core Volume (CV) |         |
|-------------|-----------------|---------------|-------------------|---------|------------------|---------|
|             | Diameter        | log(diameter) | WV                | log(WV) | CV               | log(CV) |
| 50          | 5.61            | 6.61          | 5.60              | 5.00    | 5.71             | 7.70    |
| 100         | 5.53            | 6.75          | 5.30              | 5.00    | 6.30             | 8.30    |
| 150         | 5.47            | 6.96          | 5.22              | 5.42    | 7.01             | 8.87    |
| 200         | 5.44            | 7.23          | 5.21              | 5.90    | 7.68             | 9.37    |
| 250         | 5.43            | 7.49          | 5.19              | 6.39    | 8.43             | 9.98    |
| 279         | 5.45            | 7.64          | 5.25              | 6.65    | 8.82             | 10.28   |

CV—Core volume; WV—Whole volume.

**Table S4b.** Percentage of resamples in which the multivariable tumour size model adjusted for patient gender (i.e., gender + tumour size in the model) has a tumour size regression coefficient Wald test p-value <0.05.

| Sample size | Tumour Diameter |               | Whole Volume (WV) |         | Core Volume (CV) |         |
|-------------|-----------------|---------------|-------------------|---------|------------------|---------|
|             | Diameter        | log(diameter) | WV                | log(WV) | CV               | log(CV) |
| 50          | 5.40            | 6.63          | 5.58              | 4.74    | 5.33             | 8.30    |
| 100         | 5.30            | 6.65          | 5.28              | 4.78    | 5.54             | 9.08    |
| 150         | 5.27            | 6.78          | 5.19              | 5.10    | 5.77             | 9.82    |
| 200         | 5.24            | 6.95          | 5.12              | 5.57    | 6.07             | 10.62   |
| 250         | 5.27            | 7.15          | 5.07              | 6.03    | 6.32             | 11.39   |
| 279         | 5.20            | 7.28          | 5.10              | 6.33    | 6.48             | 11.90   |

CV—Core volume; WV—Whole volume.

**Table S4c.** Percentage of resamples in which the multivariable tumour size model adjusted for adjuvant oncology treatment received (i.e., oncology treatment + tumour size in the model) has a tumour size regression coefficient Wald test p-value <0.05.

| Sample size | Tumour Diameter |               | Whole Volume (WV) |         | Core Volume (CV) |         |
|-------------|-----------------|---------------|-------------------|---------|------------------|---------|
|             | Diameter        | log(diameter) | WV                | log(WV) | CV               | log(CV) |
| 50          | 9.50            | 9.74          | 7.59              | 6.94    | 7.41             | 10.43   |
| 100         | 9.30            | 10.10         | 6.97              | 6.65    | 7.68             | 11.08   |
| 150         | 9.18            | 10.48         | 6.72              | 6.65    | 7.92             | 11.73   |
| 200         | 9.08            | 10.96         | 6.51              | 6.67    | 8.23             | 12.30   |
| 250         | 9.08            | 11.42         | 6.50              | 6.83    | 8.53             | 12.94   |
| 279         | 9.03            | 11.77         | 6.42              | 6.94    | 8.77             | 13.22   |

CV—Core volume; WV—Whole volume.

**Table S4d.** Percentage of resamples in which the multivariable tumour size model adjusted for MGMT promoter methylation (ie. MGMT methylation + tumour size in model) has a tumour size regression coefficient Wald test p-value <0.05.

| Sample size      | Tumour Diameter |               | Whole Volume (WV) |         | Core Volume (CV) |         |
|------------------|-----------------|---------------|-------------------|---------|------------------|---------|
|                  | Diameter        | log(diameter) | WV                | log(WV) | CV               | log(CV) |
| 50               | 6.52            | 8.29          | 6.31              | 5.85    | 5.89             | 10.80   |
| 100              | 6.78            | 8.51          | 6.03              | 5.86    | 6.07             | 11.44   |
| 150              | 7.05            | 8.55          | 5.89              | 6.26    | 6.27             | 11.87   |
| 200              | 7.29            | 8.57          | 5.79              | 6.75    | 6.53             | 12.23   |
| 250              | 7.63            | 8.54          | 5.75              | 7.34    | 6.86             | 12.58   |
| 258 <sup>a</sup> | 7.80            | 8.52          | 5.74              | 7.63    | 6.97             | 12.74   |

CV—Core volume; WV—Whole volume.

<sup>a</sup>Maximum sample size limited to 258 due to the number of cases with a known MGMT result.
